# Supplementary material
Source: bioRxiv or medRxiv preprint supplement (https://medrxiv.org/highwire/filestream/90507/field_highwire_adjunct_files/0/2020.06.16.20132423-1.pdf)
Supplement: Supplementary file [file 2020.06.16.20132423-1.pdf]

## **Supplementary Appendix**

This appendix has been provided by the authors to give readers additional information about their work.  
Supplement to: Ruijie L, Yihan Y, Jiayu H, Jixian Z, Sha X, Renrong S, et al. Seroprevalence and epidemiological characteristics of immunoglobulin M and G antibodies against SARS-CoV-2 in asymptomatic people in Wuhan, China.

## TABLE OF CONTENT

|                                                                                                                                                                                                                                    |   |
|------------------------------------------------------------------------------------------------------------------------------------------------------------------------------------------------------------------------------------|---|
| SUPPLEMENTARY TABLES .....                                                                                                                                                                                                         | 3 |
| Table S1 Numbers of male and female people aged from 4 to 81 in Wuhan in 2017.....                                                                                                                                                 | 3 |
| Table S2 Seroprevalence of IgM in asymptomatic individuals and odds ratio by time series.....                                                                                                                                      | 3 |
| Table S3 Incidence of Covid-19 from March 25 to April 28 in all urban areas of Wuhan city.....                                                                                                                                     | 4 |
| SUPPLEMENTARY FIGURES .....                                                                                                                                                                                                        | 5 |
| Figure S1 Daily numbers of COVID-19 confirmed cases reported in Wuhan and the time of screening study for COVID-19.....                                                                                                            | 5 |
| Figure S2 Sex and age distribution of participants with screening test for COVID-19 compared with the Wuhan population, screening study, March 25 to April 28, 2020, Wuhan.....                                                    | 5 |
| Figure S3 Abnormal rate of chest CT imaging between IgG positive and negative of asymptomatic individuals in Wuhan, 2020. ....                                                                                                     | 6 |
| Figure S4 Abnormal rate of chest CT imaging between IgM positive and negative of asymptomatic individuals in Wuhan, 2020. ....                                                                                                     | 6 |
| Figure S5 The cumulative number of patient reported diagnosed by RT-PCR for COVID-19 and incidence rate of COVID-19 per ten thousand, by the time of April 28, 2020, grouped by each of the 13 districts of the city of Wuhan..... | 7 |

**SUPPLEMENTARY TABLES**

**Table S1.** Numbers of male and female people aged from 4 to 81 in Wuhan in 2017

| Aged group(Years old) | Male    | Female  | Total   |
|-----------------------|---------|---------|---------|
| 4 ~                   | 583194  | 493770  | 1076964 |
| 20 ~                  | 256003  | 209481  | 465484  |
| 25 ~                  | 404864  | 371347  | 776211  |
| 30 ~                  | 421463  | 395119  | 816582  |
| 35 ~                  | 337088  | 325508  | 662596  |
| 40 ~                  | 290599  | 288596  | 579195  |
| 45 ~                  | 367525  | 366927  | 734452  |
| 50 ~                  | 350878  | 343543  | 694421  |
| 55 ~                  | 284393  | 283954  | 568347  |
| 60 ~                  | 303427  | 316329  | 619756  |
| 65 ~ 81               | 482899  | 513251  | 996150  |
| Total                 | 4082333 | 3907825 | 7990158 |

Note: Data from Wuhan Statistical Yearbook-2018, population grouped by age (2017). China Academic Journal Electronic Publishing House.

**Table S2.** Seroprevalence of IgM in asymptomatic individuals and odds ratio by time series

| Five-day period | n    | Crude seroprevalence of IgM | Adjust seroprevalence of IgM | Odds ratio(95%CI) | P value | Odds ratio(95%CI) adjusting for age and sex | P value |
|-----------------|------|-----------------------------|------------------------------|-------------------|---------|---------------------------------------------|---------|
| 1               | 523  | 1.34(0.35-2.32)             | 0.71(0.00-1.43)              | 4.50(1.51-13.5)   | 0.007   | 3.94(1.31-11.8)                             | 0.014   |
| 2               | 1694 | 0.71(0.31-1.11)             | 0.60(0.23-0.97)              | 2.37(0.89-6.33)   | 0.085   | 1.98(0.73-5.33)                             | 0.177   |
| 3               | 1222 | 0.65(0.20-1.11)             | 0.38(0.04-0.72)              | 2.19(0.76-6.32)   | 0.148   | 1.62(0.55-4.78)                             | 0.378   |
| 4               | 4046 | 0.59(0.36-0.83)             | 0.44(0.24-0.64)              | 1.98(0.81-4.85)   | 0.135   | 1.58(0.64-3.91)                             | 0.325   |
| 5               | 6695 | 0.37(0.23-0.52)             | 0.27(0.15-0.39)              | 1.24(0.51-3.04)   | 0.631   | 1.04(0.42-2.56)                             | 0.930   |
| 6               | 2534 | 0.28(0.07-0.48)             | 0.16(0.00-0.32)              | 0.92(0.31-2.74)   | 0.881   | 0.72(0.24-2.18)                             | 0.564   |
| 7               | 1998 | 0.30(0.06-0.54)             | 0.24(0.21-0.45)              |                   |         |                                             |         |

Note: n is the total number of individuals.

**Table S3.** Incidence of Covid-19 from March 25 to April 28 in all urban areas of Wuhan city

| Urban areas            | Cumulative number of cases reported in March 25 | Cumulative number of cases reported in April 28 | Number of new cases reported during the period | Permanent population | Incidence rate (/100000) | 95%CI |      |
|------------------------|-------------------------------------------------|-------------------------------------------------|------------------------------------------------|----------------------|--------------------------|-------|------|
| Jianghan               | 5183                                            | 5242                                            | 59                                             | 729700               | 8.09                     | 8.02  | 8.15 |
| Huangpi                | 2114                                            | 2117                                            | 3                                              | 1011900              | 0.30                     | 0.29  | 0.31 |
| Hanyang                | 4670                                            | 4691                                            | 21                                             | 664200               | 3.16                     | 3.12  | 3.20 |
| Jiangan                | 6549                                            | 6563                                            | 14                                             | 962700               | 1.45                     | 1.43  | 1.48 |
| Qiaokou                | 6834                                            | 6854                                            | 20                                             | 868700               | 2.30                     | 2.27  | 2.33 |
| Wuchang                | 7458                                            | 7551                                            | 93                                             | 1282800              | 7.25                     | 7.20  | 7.29 |
| Hongshan               | 4679                                            | 4718                                            | 39                                             | 1677300              | 2.33                     | 2.30  | 2.35 |
| Dongxihu               | 2462                                            | 2471                                            | 9                                              | 584800               | 1.54                     | 1.51  | 1.57 |
| Caidian and the others | 9831                                            | 9903                                            | 72                                             | 3298900              | 2.18                     | 2.17  | 2.20 |
| Total                  | 50003                                           | 50333                                           | 327                                            | 11081000             | 2.98                     | 2.97  | 2.99 |

Data from :

1. Update on Covid-19 outbreak in Wuhan. 2020. [http://wjw.wuhan.gov.cn/ztl\\_28/fk/tzgg/202004/t20200430\\_1202887.shtml](http://wjw.wuhan.gov.cn/ztl_28/fk/tzgg/202004/t20200430_1202887.shtml) (accessed 03 June 2020).
2. Update on Covid-19 outbreak in Wuha. 2020. [http://wjw.wuhan.gov.cn/ztl\\_28/fk/tzgg/202004/t20200430\\_1198159.shtml](http://wjw.wuhan.gov.cn/ztl_28/fk/tzgg/202004/t20200430_1198159.shtml) (accessed 3 June 2020 ).
3. A brief analysis of resident population in Wuhan in 2018. 2020. [http://tj.wuhan.gov.cn/tjfw/tjfx/202001/t20200115\\_840940.shtml](http://tj.wuhan.gov.cn/tjfw/tjfx/202001/t20200115_840940.shtml) (accessed 23 March 2020 ).

**SUPPLEMENTARY FIGURES**

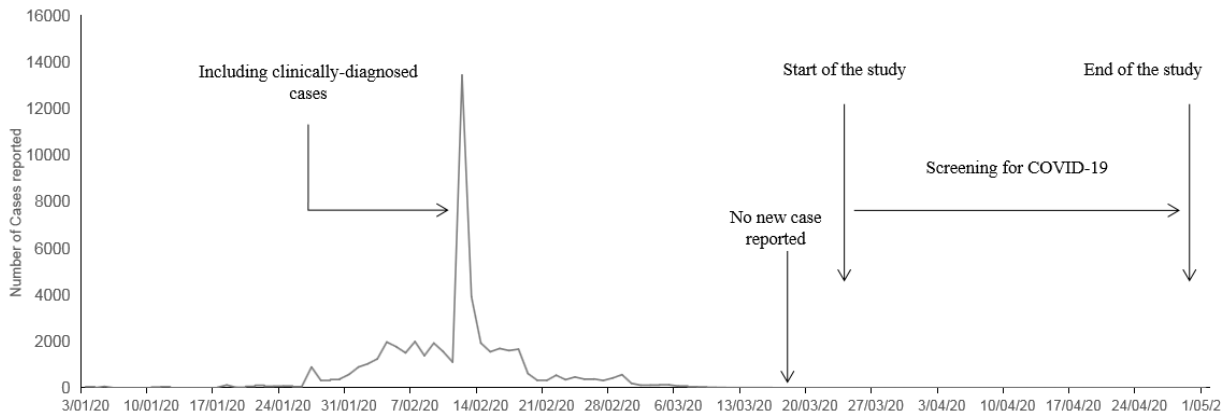

**Figure S1.** Daily numbers of COVID-19 confirmed cases reported in Wuhan and the time of screening study for COVID-19.

Data from: Covid-19 in Hubei province from 25 March 2020 to 28 April 2020. [http://wjw.hubei.gov.cn/fbjd/tzgg/index\\_38.shtml](http://wjw.hubei.gov.cn/fbjd/tzgg/index_38.shtml); [http://wjw.hubei.gov.cn/fbjd/tzgg/index\\_15.shtml](http://wjw.hubei.gov.cn/fbjd/tzgg/index_15.shtml).

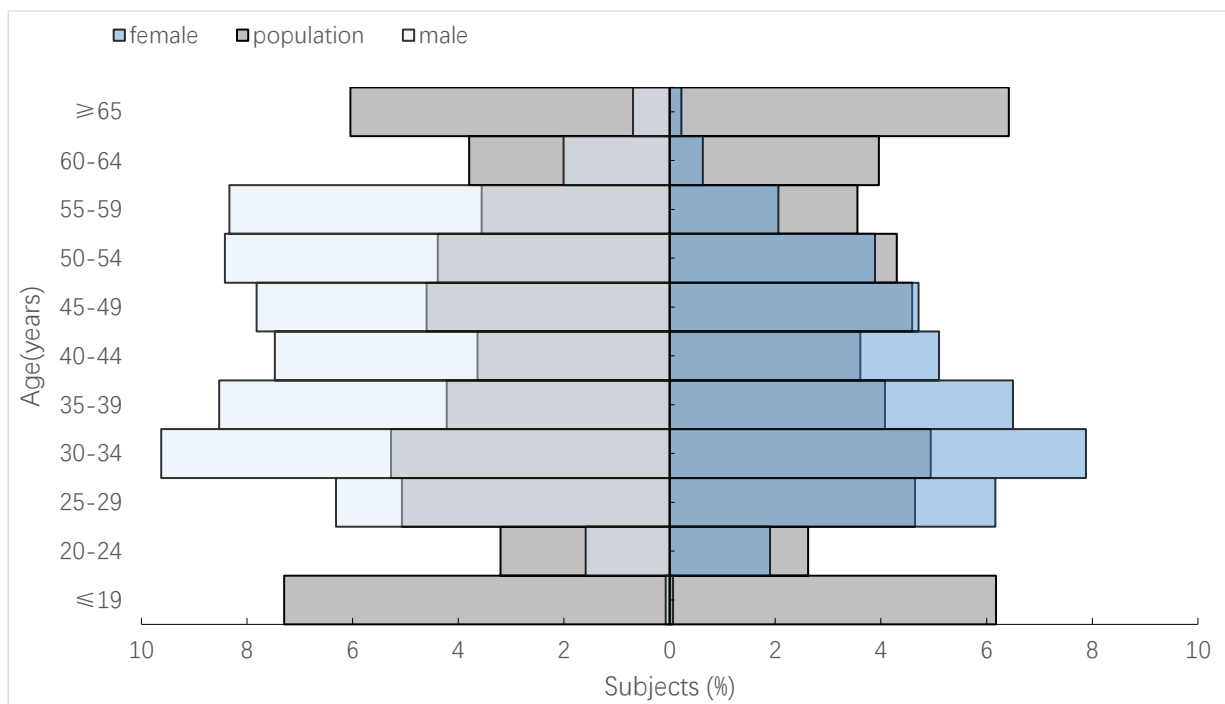

**Figure S2.** Sex and age distribution of participants with screening test for COVID-19 compared with the Wuhan population, screening study, March 25 to April 28, 2020, Wuhan.

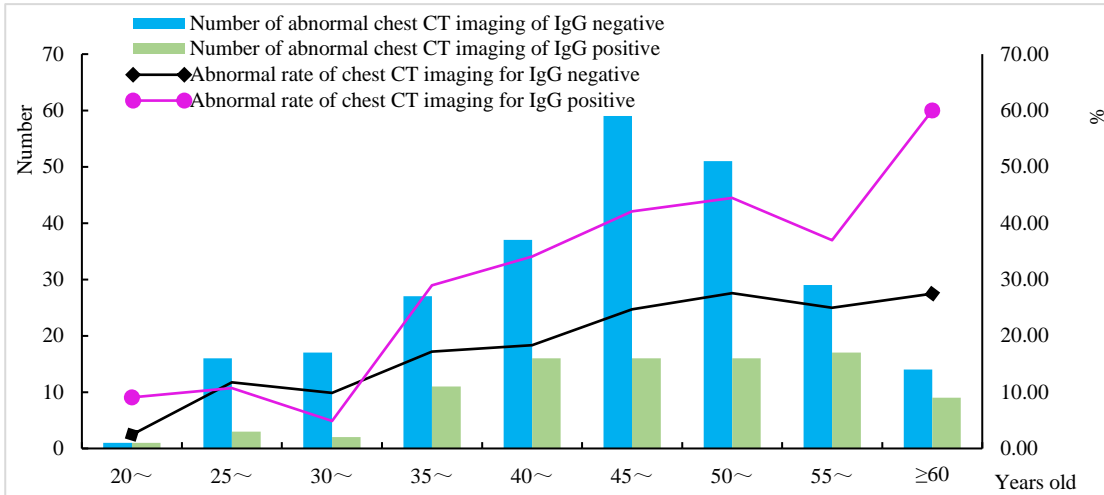

**Figure S3.** Abnormal rate of chest CT imaging between IgG positive and negative of asymptomatic individuals in Wuhan, 2020

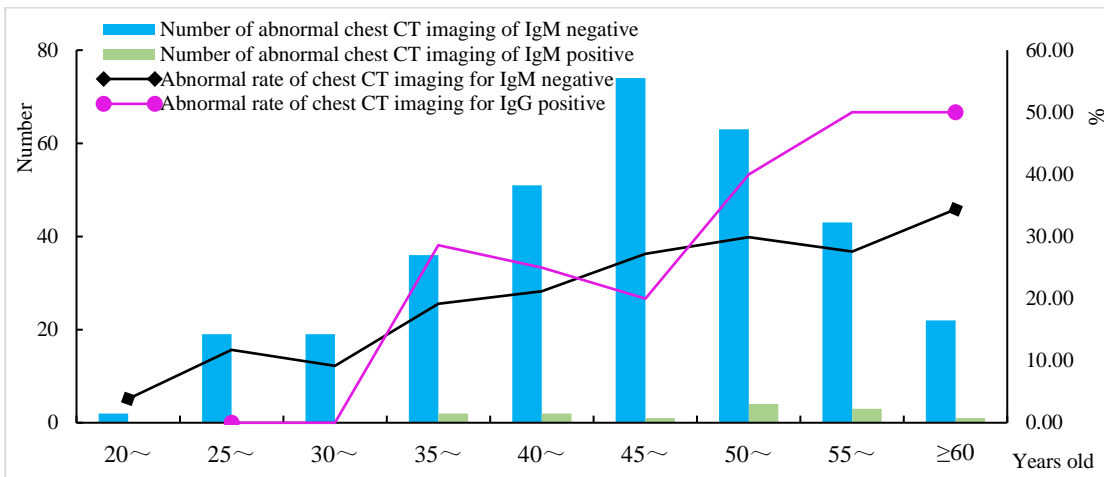

**Figure S4.** Abnormal rate of chest CT imaging between IgM positive and negative of asymptomatic individuals in Wuhan, 2020

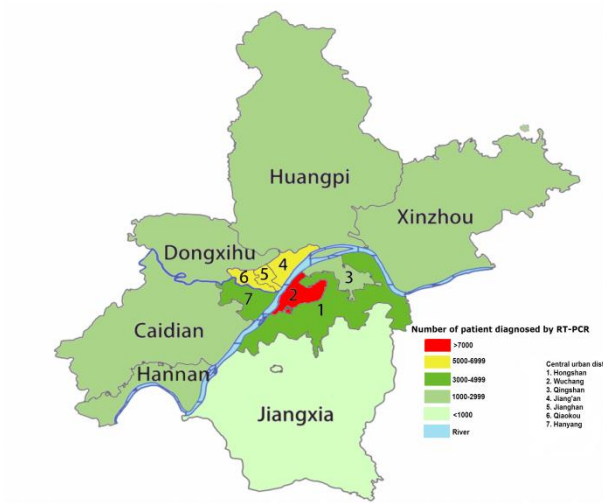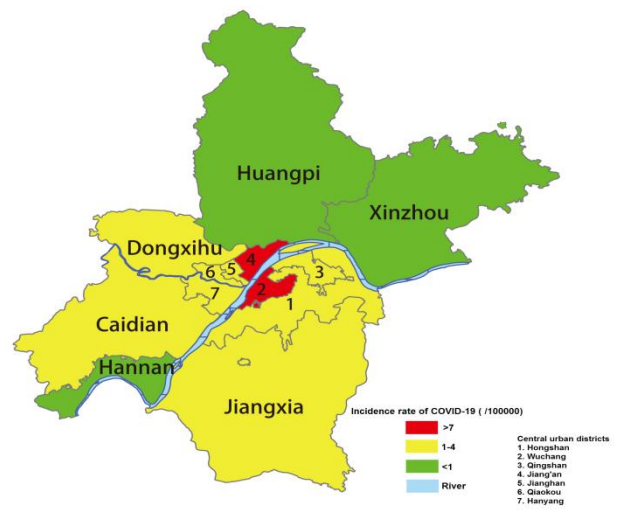

**Figure S5.** The cumulative number of patient reported diagnosed by RT-PCR for COVID-19 and incidence rate of COVID-19 per ten thousand, by the time of April 28, 2020, grouped by each of the 13 districts of the city of Wuhan.
